# Supplementary material for: Systematic Literature Review and Meta-Analysis of Sacral Neuromodulation (SNM) in Patients with Neurogenic Lower Urinary Tract Dysfunction (nLUTD): Over 20 Years’ Experience and Future Directions
Source: Springer Nature journal article supplement (doi:10.1007/s12325-021-01650-9), 2021-03-13
Supplement: MOESM1 [file 18961878]

## Online supplement

Search strategies are presented in Table 1. Searches including hand searches cover a time period between January 1998 and March 31, 2020.

### Table S1: Search strategy

#### Cochrane Library

Includes Cochrane Database of Systematic Reviews (CDSR), Database of Abstracts of Reviews of Effects (DARE), Cochrane Central Trials Register (CENTRAL), NHS Economic Evaluations Database (NHSEED), Health Technology Assessment Database (HTAD)

Search Strategy:

#1 MeSH descriptor: [Electric Stimulation Therapy] this term only

#2 ((sacral or bilateral or unilateral) near/3 (modul\$\* or stimul\* or neuromodul\* or neurostimul\* or electromodul\* or electrostimul\*)):ti,ab

#3 (sns or snm):ti,ab

#4 #1 or #2 or #3

#5 MeSH descriptor: [Urinary Incontinence] explode all trees

#6 ((urine or urinary) near/1 incontinen\*):ti,ab

#7 MeSH descriptor: [Lower Urinary Tract Symptoms] explode all trees

#8 (lower urinary tract near/1 (dysfunction\* or symptom\*)):ti,ab

#9 MeSH descriptor: [Urinary Bladder, Neurogenic] this term only

#10 ((neurogenic or neurogenesis or neuropathic or spastic) near/2 bladder):ti,ab

#11 MeSH descriptor: [Urinary Retention] this term only

#12 ((urin\* near/1 retention) or ischuria):ti,ab

#13 voiding dysfunction:ti,ab

#14 #5 or #6 or #7 or #8 or #9 or #10 or #11 or #12 or #13

#15 MeSH descriptor: [Multiple Sclerosis] this term only

#16 multiple sclerosis:ti,ab

#17 MeSH descriptor: [Spinal Cord Injuries] this term only

#18 (spinal cord near/1 (injur\* or trauma\* or damag\*)):ti,ab

#19 MeSH descriptor: [Cerebrovascular Disorders] explode all trees

#20 ((cerebrovascular or "cerebral vascular") near/1 (disease\$\* or disorder\*)):ti,ab

#21 MeSH descriptor: [Parkinson Disease] this term only

#22 parkinson\*:ti,ab

#23 MeSH descriptor: [Alzheimer Disease] this term only

#24 alzheimer\*:ti,ab

#25 MeSH descriptor: [Reflex, Abnormal] this term only

#26 (detrusor near/2 (sphincter or dyssynergia or hyperreflexia or overactiv\*)):ti,ab

#27 (neurogenic or neurogenesis or neuropathic or neurologic\*):ti,ab

#28 MeSH descriptor: [Diabetes Mellitus] explode all trees

#29 diabet\*:ti,ab

#30 ((neurologic\$\* or nerve or pelvic plexus) near/2 (injur\* or trauma\* or damag\*)):ti,ab

#31 MeSH descriptor: [Nervous System Diseases] this term only and with qualifier(s): [Complications - CO]

#32 MeSH descriptor: [Spinal Dysraphism] explode all trees

#33 ((spine or spina\*) near/2 (dysraphi\* or bifida)):ti,ab

#34 MeSH descriptor: [Meningomyelocele] this term only

#35 (MMC or myelomeningocele\* or meningomyelocele\* or myelocystocele\* or myelomeningocaele\* or meningomyelocaele\* or myelocystocaele\*):ti,ab

#36 ((sacral or sacrum) near/2 malform\*):ti,ab

#37 #15 or #16 or #17 or #18 or #19 or #20 or #21 or #22 or #23 or #24 or #25 or #26 or #27 or #28 or #29 or #30 or #31 or #32 or #33 or #34 or #35 or #36 #38 #4 and #14 and #37

## Medline

Searched via OvidSP interface.

Database: Ovid MEDLINE(R) Epub Ahead of Print, In-Process & Other Non-Indexed Citations, Ovid MEDLINE(R) Daily and Ovid MEDLINE(R) <1946 to Present>

Search Strategy:

- 1 Electric Stimulation Therapy/
- 2 ((sacral or bilateral or unilateral) adj3 (modul\$ or stimul\$ or neuromodul\$ or neurostimul\$ or electromodul\$ or electrostimul\$)).ti,ab.
- 3 (sns or snm).ti,ab.
- 4 or/1-3
- 5 exp Urinary Incontinence/

- 6 ((urine or urinary) adj1 incontinen\$).ti,ab.
- 7 exp Lower Urinary Tract Symptoms/
- 8 (lower urinary tract adj1 (dysfunction\$ or symptom\$)).ti,ab.
- 9 Urinary Bladder, Neurogenic/
- 10 ((neurogenic or neurogenesis or neuropathic or spastic) adj2 bladder).ti,ab.
- 11 Urinary Retention/
- 12 ((urin\$ adj1 retention) or ischuria).ti,ab.
- 13 voiding dysfunction.ti,ab.
- 14 or/5-13
- 15 multiple sclerosis/ or multiple sclerosis.ti,ab.
- 16 spinal cord injuries/ or (spinal cord adj1 (injur\$ or trauma\$ or damag\$)).ti,ab.
- 17 exp Cerebrovascular Disorders/ or ((cerebrovascular or "cerebral vascular") adj1 (disease\$ or disorder\$)).ti,ab.
- 18 Parkinson disease/ or parkinson\$.ti,ab.
- 19 Alzheimer disease/ or alzheimer\$.ti,ab.
- 20 Reflex, Abnormal/ or (detrusor adj2 (sphincter or dyssynergia or hyperreflexia or overactiv\$)).ti,ab.
- 21 (neurogenic or neurogenesis or neuropathic or neurologic\$).ti,ab.
- 22 exp Diabetes Mellitus/ or diabet\$.ti,ab.
- 23 ((neurologic\$ or nerve or pelvic plexus) adj2 (injur\$ or trauma\$ or damag\$)).ti,ab.
- 24 Nervous System Diseases/co [Complications]
- 25 exp Spinal Dysraphism/
- 26 ((spine or spina\$) adj2 (dysraphi\$ or bifida)).ti,ab.
- 27 Meningomyelocele/
- 28 (MMC or myelomeningoc?ele\$ or meningomyeloc?ele\$ or myelocystoc?ele\$).ti,ab.
- 29 ((sacral or sacrum) adj2 malform\$).ti,ab.
- 30 or/15-29 (1311965)
- 31 4 and 14 and 30

**Embase**

Searched via OvidSP interface.

Database: Embase <1974 to present >

Search Strategy:

- 1 Sacral nerve stimulation/
- 2 ((sacral or bilateral or unilateral) adj3 (modul\$ or stimul\$ or neuromodul\$ or neurostimul\$ or electromodul\$ or electrostimul\$)).ti,ab.
- 3 (sns or snm).ti,ab.
- 4 or/1-3
- 5 exp urine incontinence/
- 6 ((urine or urinary) adj1 incontinen\$).ti,ab.
- 7 exp lower urinary tract symptom/
- 8 (lower urinary tract adj1 (dysfunction\$ or symptom\$)).ti,ab.
- 9 voiding dysfunction.ti,ab.
- 10 neurogenic bladder/
- 11 ((neurogenic or neurogenesis or neuropathic or spastic) adj2 bladder).ti,ab.
- 12 urine retention/
- 13 ((urin\$ adj1 retention) or ischuria).ti,ab.
- 14 or/5-13
- 15 multiple sclerosis/ or multiple sclerosis.ti,ab.
- 16 spinal cord injury/ or (spinal cord adj1 (injur\$ or trauma\$ or damag\$)).ti,ab.
- 17 exp cerebrovascular disease/ or ((cerebrovascular or "cerebral vascular") adj1 (disease\$ or disorder\$)).ti,ab.
- 18 Parkinson disease/ or parkinson\$.ti,ab.
- 19 Alzheimer disease/ or alzheimer\$.ti,ab.
- 20 hyperreflexia/ or detrusor dyssynergia/ or (detrusor adj2 (sphincter or dyssynergia or hyperreflexia or overactiv\$)).ti,ab.
- 21 (neurogenic or neurogenesis or neuropathic).ti,ab.
- 22 exp Diabetes Mellitus/ or diabet\$.ti,ab.
- 23 nerve injury/ or ((neurologic\$ or nerve or pelvic plexus) adj2 (injur\$ or trauma\$ or damag\$)).ti,ab.
- 24 neurologic disease/co [Complication]

- 25 exp spinal dysraphism/ (10053)
- 26 ((spine or spina\$) adj2 (dysraphi\$ or bifida)).ti,ab.
- 27 myelomeningocele/
- 28 (MMC or myelomeningoc?ele\$ or meningomyeloc?ele\$ or myelocystoc?ele\$).ti,ab.
- 29 ((sacral or sacrum) adj2 malform\$).ti,ab.
- 30 or/15-29
- 31 4 and 14 and 30

### **ClinicalTrials.gov**

Searched via <https://clinicaltrials.gov>

In Advanced Search/Targeted search terms entered into Condition field and Intervention field.  
No other limits applied. Three searches run as intervention terms too long for single search;

#### Search #1

In Condition field;

((urine OR urinary OR urine OR urinary OR voiding) AND (incontinence OR incontinent OR retention OR dysfunction OR disfunction)) OR ischuria OR ((neurogenic or neurogenesis or neuropathic or spastic) AND bladder)

In Intervention field;

SNM OR SNS OR "sacral neuromodulation" OR "sacral neurostimulation" OR "sacral neuroelectromodulation" OR "sacral neuroelectrostimulation" OR "sacral nerve modulation" OR "sacral nerve stimulation"

#### Search #2

In Condition field;

((urine OR urinary OR urine OR urinary OR voiding) AND (incontinence OR incontinent OR retention OR dysfunction OR disfunction)) OR ischuria OR ((neurogenic or neurogenesis or neuropathic or spastic) AND bladder)

In Intervention field;

"sacral nerve electromodulation" OR "sacral nerve electrostimulation" OR "sacral nerve electromodulation" OR "bilateral neuromodulation" OR "bilateral neurostimulation" OR "bilateral neuroelectromodulation" OR "bilateral neuroelectrostimulation"

#### Search #3

In Condition field;

((urine OR urinary OR urine OR urinary OR voiding) AND (incontinence OR incontinent OR retention OR

dysfunction OR disfunction)) OR ischuria OR ((neurogenic or neurogenesis or neuropathic or spastic) AND bladder)

In Intervention field;

"bilateral nerve modulation" OR "bilateral nerve stimulation" OR "bilateral nerve electromodulation" OR "bilateral nerve electrostimulation" OR "bilateral nerve electromodulation"

WHO ICTRP

Searched via <http://apps.who.int/trialsearch/AdvSearch.aspx>

Search #1

In Condition field;

((urine OR urinary OR urine OR urinary OR voiding) AND (incontinence OR incontinent OR retention OR dysfunction OR disfunction)) OR ischuria OR ((neurogenic or neurogenesis or neuropathic or spastic) AND bladder)

In Intervention field;

SNM OR SNS OR "sacral neuromodulation" OR "sacral neurostimulation" OR "sacral neuroelectromodulation" OR "sacral neuroelectrostimulation" OR "sacral nerve modulation" OR "sacral nerve stimulation"

Search #2

In Condition field;

((urine OR urinary OR urine OR urinary OR voiding) AND (incontinence OR incontinent OR retention OR dysfunction OR disfunction)) OR ischuria OR ((neurogenic or neurogenesis or neuropathic or spastic) AND bladder)

In Intervention field;

"sacral nerve electromodulation" OR "sacral nerve electrostimulation" OR "sacral nerve electromodulation" OR "bilateral neuromodulation" OR "bilateral neurostimulation" OR "bilateral neuroelectromodulation" OR "bilateral neuroelectrostimulation"

Search #3

In Condition field;

((urine OR urinary OR urine OR urinary OR voiding) AND (incontinence OR incontinent OR retention OR dysfunction OR disfunction)) OR ischuria OR ((neurogenic or neurogenesis or neuropathic or spastic) AND bladder)

In Intervention field;

"bilateral nerve modulation" OR "bilateral nerve stimulation" OR "bilateral nerve electromodulation" OR "bilateral nerve electrostimulation" OR "bilateral nerve electromodulation"

**Table S2. Publication bias and reporting quality of success rates of included studies for permanent SNM**

| <b>Author [year]</b>                  | <b>N</b> | <b>Parameter for success rate</b>                          | <b>Funding support by manufacturer?</b> |
|---------------------------------------|----------|------------------------------------------------------------|-----------------------------------------|
| <b>Al-Azzawi et al. [2018]</b>        | 4        | ≥50% improvement                                           | None                                    |
| <b>Amundsen et al. [2005]</b>         | 23       | cured                                                      | NR                                      |
| <b>Andretta et al. [2014]</b>         | 17       | significant and lasting improvement + QoL + active implant | NR                                      |
| <b>Arlen et al. [2011]</b>            | 20       | ≥50% improvement                                           | NR                                      |
| <b>Bertapelle et al. [2008]</b>       | 12       | Cure or improved voiding (1-2 catheterizations/d)          | NR                                      |
| <b>Carone et al. [1999]</b>           | 12       | Positive or intermediate patient outcome                   | NR                                      |
| <b>Chaabane et al. [2011]</b>         | 37       | ≥50% improvement*                                          | None                                    |
| <b>Chartier-Kastler et al. [2000]</b> | 9        | ≥75% improvement                                           | None                                    |
| <b>Chen et al. [2015]</b>             | 13       | ≥50% improvement + no therapy failure                      | None                                    |
| <b>Daniels et al. [2010]</b>          | 24       | Non-explant / non-therapy failure                          | None                                    |
| <b>Denzinger et al. [2012]</b>        | 7        | ≥50% improvement / active implant                          | NA                                      |
| <b>Engeler et al. [2015]</b>          | 16       | ≥70% improvement / subjective success                      | None                                    |
| <b>Hohenfellner et al. [1998]</b>     | 11       | ≥50% improvement                                           | NR                                      |
| <b>Hohenfellner et al. [2001]</b>     | 12       | ≥50% improvement + active implant                          | NR                                      |
| <b>Ishigooka et al. [1998]</b>        | 4        | urodynamic + subjective improvement                        | NR                                      |
| <b>Lavano 2004</b>                    | 6        | ≥50% improvement                                           | NR                                      |
| <b>Lombardi [2014]</b>                | 34       | ≥50% improvement                                           | None                                    |
| <b>Marinkovic et al. [2010]</b>       | 12       | ≥50% improvement                                           | NR                                      |
| <b>Minardi et al. 2012]</b>           | 15       | ≥50% improvement + active implant                          | None                                    |
| <b>Peters et al. [2013]</b>           | 63       | Non-explants                                               | None                                    |
| <b>Sharifiaghdas [2019]</b>           | 4        | ≥50% improvement                                           | None                                    |
| <b>Sievert et al. [2010]</b>          | 10       | No leakage / active implant                                | Yes                                     |
| <b>Wallace et al. [2007]</b>          | 28       | Patient satisfaction / non-explants                        | NR                                      |
| <b>Wöllner et al. [2016]</b>          | 35       | ≥50% improvement / patient satisfaction                    | None                                    |

NR: not reported

NA: information not available

\*both clinical and urodynamic improvement

**Figure S1A. Additional meta-analysis of the test success rate of SNM (Forest plot including studies with  $\geq 10$  patients)**

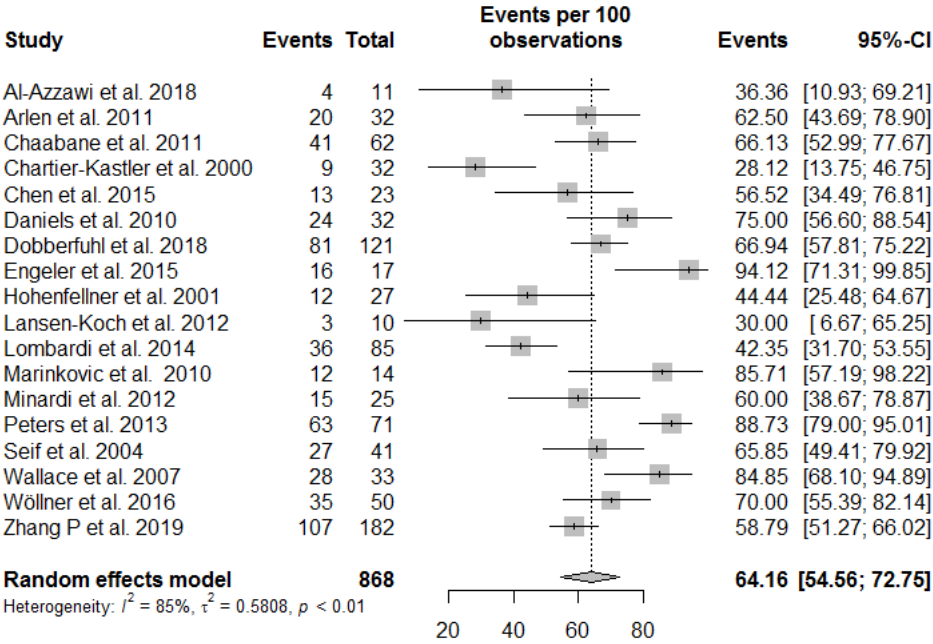



**Figure S1B. Additional meta-analysis of the SNM success rate of the permanent implant (Forest plot including studies with  $\geq 10$  patients)**

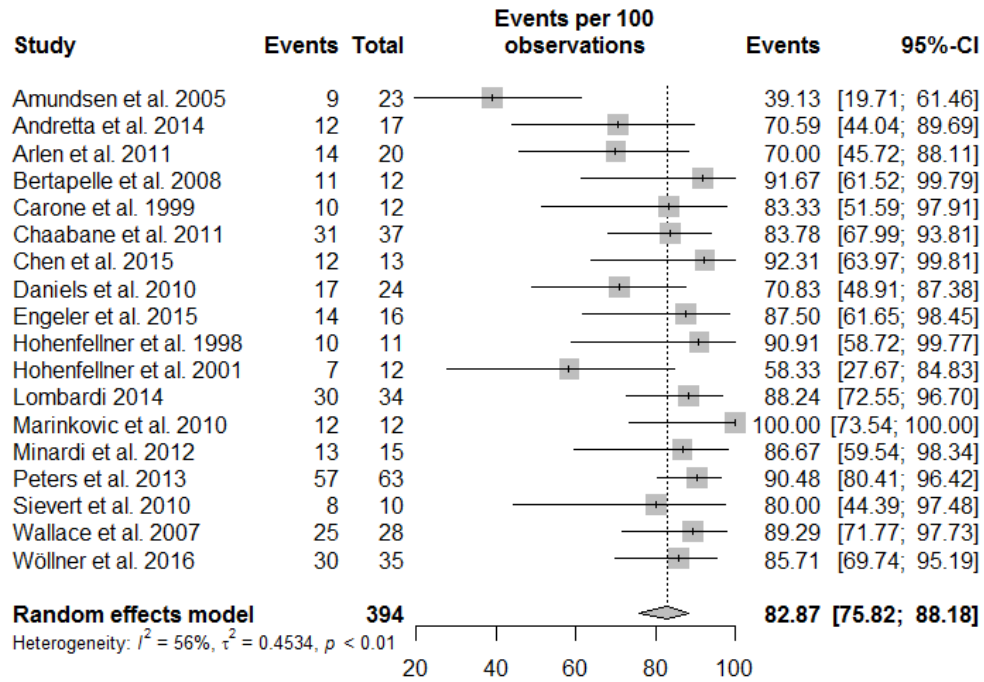

**REFERENCES of TABLE 2**

[Al-Azzawi 2018] Al-Azzawi IS, Al-Tamimi MAJ. The first Iraqi experience in sacral neuromodulation for patients with lower urinary tract dysfunction. Arab J Urol. No longer published by Elsevier; 2018;16: 391–396.

[Amundsen 2005] Amundsen CL, Romero AA, Jamison MG, Webster GD. Sacral neuromodulation for intractable urge incontinence: Are there factors associated with cure? Urology. 2005;66: 746–750.

[Andretta 2014] Andretta E, Simeone C, Ostardo E, Pastorello M, Zuliani C. Usefulness of sacral nerve modulation in a series of multiple sclerosis patients with bladder dysfunction. J Neurol Sci. 2014;347: 257–261.

[Arlen 2011] Arlen AM, Powell CR, Kreder KJ. Sacral Neuromodulation for Refractory Urge Incontinence Is Less Effective Following Spinal Surgery. Sci World J. 2011;11: 142–146.

[Bartley 2017] Bartley JM, Killinger KA, Boura J et al. The impact of prior back surgery on neuromodulation outcomes: A review of over 500 patients. Neurourol Urodyn. 2017;36(6):1535-1542.

[Bertapelle 2008] Bertapelle P, Bodo G, Carone R. Detrusor acontractility in urinary retention: detrusor contractility test as exclusion criteria for sacral neurostimulation. J Urol. 2008;180(1):215-216.

[Bosch 1998] Bosch JL, Groen J. Neuromodulation: urodynamic effects of sacral (S3) spinal nerve stimulation in patients with detrusor instability or detrusor hyperflexia. Behav Brain Res. 1998;92: 141–150.

[Bosch 2000] Bosch JL, Groen J. Sacral nerve neuromodulation in the treatment of patients with refractory motor urge incontinence: long-term results of a prospective longitudinal study. J Urol. 2000;163: 1219–1222.

[Bross 2003] Bross S, Braun PM, Weiss J, Martinez Portillo FJ, Knoll T, Seif C, et al. The role of the carbachol test and concomitant diseases in patients with nonobstructive urinary retention undergoing sacral neuromodulation. World J Urol. 2003;20:346–349.

[Carone 1999] Carone R, Bertapelle P, Zanollo A, Spinelli M, Lombardi G, Cosciani Cunico S, et al. Sacral neuromodulation in neurogenic lower urinary tract dysfunctions: results of a multicenter study group. Urologica. 1999;9:177–182.

[Chaabane 2011] Chaabane W, Guillotreau J, Castel-lacanal E, Abu-Anz S, De Boissezon X, Malavaud B, et al. Sacral neuromodulation for treating neurogenic bladder dysfunction: Clinical and urodynamic study. *Neurourol Urodyn*. 2011;30:547–550.

[Chartier-Kastler 2000] Chartier-Kastler EJ, Ruud Bosch JL, Perrigot M, Chancellor MB, Richard F, Denys P. Long-term results of sacral nerve stimulation (S3) for the treatment of neurogenic refractory urge incontinence related to detrusor hyperreflexia. *J Urol*. 2000;164: 1476–1480.

[Chartier-Kastler 2001] Chartier-Kastler EJ, Denys P, Chancellor MB, Haertig A, Bussel B, Richard F. Urodynamic monitoring during percutaneous sacral nerve neurostimulation in patients with neurogenic detrusor hyperreflexia. *Neurourol Urodyn*. John Wiley & Sons, Ltd; 2001;20:61–71. doi:10.1002/1520-6777(2001)20:1<61::AID-NAU8>3.0.CO;2-D

[Chen 2015] Chen G, Liao L. Sacral neuromodulation for neurogenic bladder and bowel dysfunction with multiple symptoms secondary to spinal cord disease. *Spinal Cord*. 2015;53:204–208.

[Daniels 2010] Daniels DH, Powell CR, Braasch MR, Kreder KJ. Sacral neuromodulation in diabetic patients: success and complications in the treatment of voiding dysfunction. *Neurourol Urodyn*. 2010;29(4):578-581.

[Denzinger 2012] Denzinger S, Nowrotek A, Weingart P, Burger M, Wieland WF, Rößler W, et al. Does Sacral Neuromodulation Lead to Relevant Reduction in the Need for Intermittent Catheterization? A Single-Center Experience on Patients With Chronic Urinary Retention. *Neuromodulation Technol Neural Interface*. 2012;15:586–591.

[Dobberfuhr 2018] Dobberfuhr AD, Mahal A, Dallas KB, Choi KM1, Comiter CV, Elliott CS. Statewide Success of Staged Sacral Neuromodulation for the Treatment of Urinary Complaints in California (2005-2011). *Female Pelvic Med Reconstr Surg*. 2018 Jul 27. doi: 10.1097/SPV.0000000000000605. [Epub ahead of print]

[Engeler 2015] Engeler DS, Meyer D, Abt D, Müller S, Schmid H-P. Sacral neuromodulation for the treatment of neurogenic lower urinary tract dysfunction caused by multiple sclerosis: a single-centre prospective series. *BMC Urol*. 2015;15:105. doi:10.1186/s12894-015-0102-x

[Garg 2007] Garg T, Machi G, Guralnick ML, O'Connor RC. Sacral neuromodulation for urinary retention after pelvic plexus injury. *Urology*. 2007;70:811.e11-e12.

[Groen 2012] Groen L-A, Hoebeke P, Loret N, Van Praet C, Van Laecke E, Ann R, et al. Sacral neuromodulation with an implantable pulse generator in children with lower urinary tract symptoms: 15-year experience. *J Urol*. 2012;188:1313–1317.

[Hohenfellner 1998] Hohenfellner M, Schultz-Lampel D, Dahms S, Matzel K, Thüroff JW. Bilateral chronic sacral neuromodulation for treatment of lower urinary tract dysfunction. *J Urol*. 1998;160(3 Pt 1):821-824

[Hohenfellner 2001] Hohenfellner M, Humke J, Hampel C, Dahms S, Matzel K, Roth S, et al. Chronic sacral neuromodulation for treatment of neurogenic bladder dysfunction: long-term results with unilateral implants. *Urology*. 2001;58:887–892.

[Ishigooka 1998] Ishigooka M, Suzuki Y, Hashimoto T, Sasagawa I, Nakada T, Handa Y. A new technique for sacral nerve stimulation: a percutaneous method for urinary incontinence caused by spinal cord injury. *Br J Urol*. 1998;81(2):315-318.

[Lansen-Koch 2012] Lansen-Koch SMP, Govaert B, Oerlemans D, Melenhorst J, Vles H, Cornips E, et al. Sacral nerve modulation for defaecation and micturition disorders in patients with spina bifida. *Colorectal Dis*. 2012;14:508–514.

[Lavano 2004] Lavano A, Volpentesta G, Aloisi M, Veltri C, Piragine G, Signorelli CD. Use of chronic sacral nerve stimulation in neurological voiding disorders. *J Neurosurg Sci*. 2004;48:157–159.

[Lombardi 2008] Lombardi G, Mondaini N, Macchiarella A, Cilotti A, Popolo G Del. Clinical Female Sexual Outcome after Sacral Neuromodulation Implant for Lower Urinary Tract Symptom (LUTS). *J Sex Med*. 2008;5:1411–1417.

[Lombardi 2009] Lombardi G, Del Popolo G. Clinical outcome of sacral neuromodulation in incomplete spinal cord injured patients suffering from neurogenic lower urinary tract symptoms. *Spinal Cord*. 2009;47:486–491.

[Lombardi 2011] Lombardi G, Nelli F, Mencarini M, Del Popolo G. Clinical concomitant benefits on pelvic floor dysfunctions after sacral neuromodulation in patients with incomplete spinal cord injury. *Spinal Cord*. 2011;49: 629–636.

[Lombardi 2013] Lombardi G, Musco S, Celso M, Ierardi A, Nelli F, Del Corso F, et al. Intravesical electrostimulation versus sacral neuromodulation for incomplete spinal cord patients suffering from neurogenic non-obstructive urinary retention. *Spinal Cord*. 2013;51:571–578.

[Lombardi 2014] Lombardi G, Musco S, Celso M, Del Corso F, Del Popolo G. Sacral neuromodulation for neurogenic non-obstructive urinary retention in incomplete spinal cord patients: a ten-year follow-up single-centre experience. *Spinal Cord*. 2014;52:241–245.

[Marinkovic 2010] Marinkovic SP, Gillen LM. Sacral neuromodulation for multiple sclerosis patients with urinary retention and clean intermittent catheterization. *Int Urogynecol J*. 2010;21:223–228.

[Marinkovic 2011] Marinkovic SP, Gillen L, Marinkovic CM. Transverse myelitis with urinary retention and clean, intermittent catheterization treated with neuromodulation. *J Reprod Med*. 2011;56(3-4):153-157.

[Minardi 2005] Minardi D, Muzzonigro G. Lower urinary tract and bowel disorders and multiple sclerosis: role of sacral neuromodulation: a preliminary report. *Neuromodulation*. 2005;8:176–181.

[Minardi 2012] Minardi D, Muzzonigro G. Sacral neuromodulation in patients with multiple sclerosis. *World J Urol*. 2012;30:123–128.

[Peters 2013] Peters KM, Kandagatla P, Killinger KA, Wolfert C, Boura JA. Clinical Outcomes of Sacral Neuromodulation in Patients With Neurologic Conditions. *Urology*. 2013;81:738–744.

[Roth 2007] Roth TM. Sacral neuromodulation and lower urinary tract dysfunction in cerebral palsy. *Int Urogynecol J Pelvic Floor Dysfunct*. 2007;18:567–569.

[Schurch 2003] Schurch B, Reilly I, Reitz A, Curt A. Electrophysiological recordings during the peripheral nerve evaluation (PNE) test in complete spinal cord injury patients. *World J Urol*. 2003;20:319–322.

[Seif 2004] Seif C, Eckermann J, Bross S, Portillo FJM, Jünemann K-P, Braun P-M. Findings with Bilateral Sacral Neurostimulation: Sixty-two PNE-Tests in Patients with Neurogenic and Idiopathic Bladder Dysfunctions. *Neuromodulation*. 2004;7:141–145.

[Sharifiaghdas 2019] Sharifiaghdas F. Sacral neuromodulation in congenital lumbo-sacral and traumatic spinal cord defects with neurogenic lower urinary tract symptoms: a single-center experience in children and adolescents. *World J Urol*. 2019;37(12):2775-2783.

[Sievert 2010] Sievert K-D, Amend B, Gakis G, Toomey P, Badke A, Kaps HP, et al. Early sacral neuromodulation prevents urinary incontinence after complete spinal cord injury. *Ann Neurol*. 2010;67:74–84.

[Spinelli 2003] Spinelli M, Giardiello G, Gerber M, Arduini A, van den Hombergh U, Malaguti S. New sacral neuromodulation lead for percutaneous implantation using local anesthesia: description and first experience. *J Urol*. 2003;170: 1905–1907.

[Wallace 2007] Wallace PA, Lane FL, Noblett KL. Sacral nerve neuromodulation in patients with underlying neurologic disease. *Am J Obstet Gynecol*. 2007;197:96.e1-96.e5.

[Wöllner 2016] Wöllner J, Krebs J, Pannek J. Sacral neuromodulation in patients with neurogenic lower urinary tract dysfunction. *Spinal Cord*. 2016;54:137–140.

[Wosnitzer 2009] Wosnitzer MS, Walsh R, Rutman MP. The use of sacral neuromodulation for the treatment of non-obstructive urinary retention secondary to Guillain-Barré syndrome. *Int Urogynecol J Pelvic Floor Dysfunct*. 2009;20:1145–1147.

[Xu 2017] Xu Z, Zhang Y, Li E. Efficacy analysis of sacral neuromodulation in treating juvenile neurogenic chronic urinary retention. *Kuwait Med J*. 2017;49: 354–361.

[Zhang C 2019] Zhang C, Wang L, Pan Y et al. Sacral nerve stimulation improves gait in Parkinson's disease. *Brain Stimul*. 2019;12(4):1075-1076.

[Zhang P 2019] Zhang P, Wang JY, Zhang Y et al. Results of Sacral Neuromodulation Therapy for Urinary Voiding Dysfunction: Five-Year Experience of a Retrospective, Multicenter Study in China. *Neuromodulation*. 2019;22(6):730-737.
